## CORRESPONDENCE

Anesthesiology  
80:959, 1994  
© 1994 American Society of Anesthesiologists, Inc.  
J. B. Lippincott Company, Philadelphia

## An Alternative to One-lung Ventilation in a Patient with a Tracheostomy

*To the Editor:*—Andros and Lennon<sup>1</sup> describe successful placement of a single-lumen endotracheal tube with a small channel containing a movable bronchial blocker (Univent tube, Vitaid, Toronto, Ontario) through a preexisting tracheostomy stoma to facilitate intrathoracic surgery. The authors state that "one-lung ventilation *via* a tracheostomy has been reported only with the use of a double-lumen tube (DLT)."

We previously have reported<sup>2</sup> placement of a bronchial blocker (Fogarty catheter) *through* a modified fiberoptic bronchoscope endotracheal tube adapter (Portex, Markham, Ontario), down the lumen of an endotracheal tube, and into the right mainstem bronchus. In a subsequent publication,<sup>3</sup> the same principle was applied to a patient with a fresh tracheostomy, in whom left lung deflation was required for surgery on a traumatically ruptured aorta. Because the tracheostomy in our patient had been performed recently, and double-lumen tube placement was judged impossible, our technique offered the only feasible method of one-lung ventilation.

**Donald Oxorn, M.D., C.M., F.R.C.P.C.**  
Department of Anaesthesia

Sunnybrook Health Science Centre  
University of Toronto  
Toronto, Ontario M4N 3M5  
Canada

### References

1. Andros TG, Lennon PF: One-lung ventilation in a patient with a tracheostomy and severe tracheobronchial disease. *ANESTHESIOLOGY* 79:1127-1128, 1993
2. Oxorn D. Use of a fiberoptic bronchoscope to assist placement of a Fogarty catheter as a bronchial blocker. *Can J Anaesth* 34:427-428, 1987
3. Oxorn DC, Pagliarello G. Traumatic rupture of the thoracic aorta: Diagnosis on fiberoptic bronchoscopy. *Can J Anaesth* 39:296-298, 1992

(Accepted for publication January 7, 1994.)

Anesthesiology  
80:959, 1994  
© 1994 American Society of Anesthesiologists, Inc.  
J. B. Lippincott Company, Philadelphia

*In Reply:*—Oxorn correctly notes that, before our case report was published, he reported the use of a bronchial blocker to allow one-lung ventilation in a patient with a tracheostomy.<sup>1</sup> A technique was employed in which a bronchial blocker was placed through the lumen of the tracheostomy tube *via* the suction port of a fiberoptic bronchoscope. In addition to the disadvantage of requiring a special bronchoscope adapter, this technique results in placement of the blocker within the lumen of the tracheostomy tube, which may add to the inherent instability of an isolated bronchial blocker.<sup>2</sup> It is our opinion that the Univent tube (Fuji Systems, Tokyo, Japan) with a self-contained bronchial blocker is technically simpler to place for one-lung ventilation and is more stable after placement. An alternative technique such as that reported by Oxorn, however, also may permit one-lung ventilation in a patient with a tracheostomy and distorted airway anatomy.

**Paul Lennon, M.D.**  
Department of Anesthesia  
National Naval Medical Center  
Bethesda, Maryland 20889-5000

### References

1. Oxorn D, Pagliarello G: Traumatic rupture of the thoracic aorta: Diagnosis on fiberoptic bronchoscopy. *Can J Anaesth* 39:296-298, 1992
2. Wilson RS: Endobronchial intubation, *Thoracic Anesthesia*. Edited by Kaplan JA. New York, Churchill Livingstone, 1991, pp 372-374

(Accepted for publication January 7, 1994.)
